# Supplementary material for: MicroRNA and mRNA Features of Malignant Pleural Mesothelioma and Benign Asbestos-Related Pleural Effusion
Source: Biomed Res Int. 2015 Feb 1;2015:635748. doi: 10.1155/2015/635748 (PMC4331157; doi:10.1155/2015/635748)
Supplement: Supplementary file 1 — Selected pathways by an integrated analyses of mRNA and miRNA data. Over-expressed genes and targets of under-expressed miRNA in mesothelioma are shown in blue and yellow shading, respectively. Genes in green shading were over-expressed and also targets of under-expressed miRNA. These included a number of prominent cancer genes such as MET and CCNE2. [file 635748.f1.xlsx]

## Sheet: final Figure
	KEGG_PATHWAYS_IN_CANCER	KEGG_AXON_GUIDANCE	REACTOME_SIGNALING_BY_TGF_BETA_RECEPTOR_COMPLEX	PID_NOTCH_PATHWAY	KEGG_ADHERENS_JUNCTION	PID_E2F_PATHWAY	PID_AVB3_INTEGRIN_PATHWAY
MAPK1								MAPK1
TGFBR2								TGFBR2				mRNA up regulation
EP300								EP300
CDC42								CDC42				mRNA up regulation and target of a down regulted miRNA
MET								MET
IGF1R								IGF1R				target of a down regulated miRNA
SMAD2								SMAD2
ITGB1								ITGB1
WASF1								WASF1
VCL								VCL
LEF1								LEF1
TCF7L1								TCF7L1
EGFR								EGFR
FGFR1								FGFR1
PARD3								PARD3
IGF1								IGF1
COL4A4								COL4A4
COL4A1								COL4A1
PIK3R1								PIK3R1
CCNE2								CCNE2
CSF1R								CSF1R
E2F3								E2F3
FN1								FN1
CCND1								CCND1
SKP2								SKP2
PIK3CA								PIK3CA
RBBP8								RBBP8
YY1								YY1
NCOR2								NCOR2
SP1								SP1
SERPINE1								SERPINE1
E2F5								E2F5
ARHGEF12								ARHGEF12
SRGAP3								SRGAP3
DPYSL5								DPYSL5
EFNB2								EFNB2
EPHB3								EPHB3
SEMA4C								SEMA4C
ROBO2								ROBO2
PLXNC1								PLXNC1
PAK6								PAK6
SRGAP2								SRGAP2
NFATC4								NFATC4
RND1								RND1
EPHA3								EPHA3
NFAT5								NFAT5
SEMA5B								SEMA5B
SEMA4F								SEMA4F
SEMA4B								SEMA4B
SEMA6A								SEMA6A
SEMA4G								SEMA4G
CFL2								CFL2
RASA1								RASA1
EPHA4								EPHA4
SEMA6D								SEMA6D
SEMA3F								SEMA3F
EFNA5								EFNA5
EFNA1								EFNA1
SEMA3C								SEMA3C
EFNA4								EFNA4
GNAI1								GNAI1
EPHB2								EPHB2
RHOD								RHOD
SEMA5A								SEMA5A
ABLIM2								ABLIM2
EPHA5								EPHA5
ACTN1								ACTN1
BAIAP2								BAIAP2
CTNND1								CTNND1
PTPRM								PTPRM
NLK								NLK
PTPRF								PTPRF
ACP1								ACP1
SSX2IP								SSX2IP
CSNK2A2								CSNK2A2
FER								FER
MAP3K7								MAP3K7
IQGAP1								IQGAP1
INSR								INSR
PVRL3								PVRL3
RXRA								RXRA
RASSF1								RASSF1
RAF1								RAF1
STAT5B								STAT5B
KIT								KIT
FZD8								FZD8
WNT1								WNT1
WNT3								WNT3
ITGA6								ITGA6
PIK3R3								PIK3R3
RET								RET
ARNT								ARNT
TRAF4								TRAF4
CDK6								CDK6
NCOA4								NCOA4
COL4A2								COL4A2
RARB								RARB
PDGFRB								PDGFRB
LAMC1								LAMC1
PPARD								PPARD
PTEN								PTEN
PDGFB								PDGFB
MMP2								MMP2
FOS								FOS
AKT3								AKT3
PDGFRA								PDGFRA
MAP2K1								MAP2K1
KITLG								KITLG
RALGDS								RALGDS
FGF13								FGF13
PAX8								PAX8
WNT16								WNT16
DVL3								DVL3
ARNT2								ARNT2
FZD6								FZD6
FZD1								FZD1
CCDC6								CCDC6
ZBTB16								ZBTB16
FGF9								FGF9
WNT2B								WNT2B
FGF18								FGF18
STAT3								STAT3
IKBKB								IKBKB
BAD								BAD
MSH2								MSH2
PTCH1								PTCH1
TGFB2								TGFB2
HGF								HGF
LAMA5								LAMA5
FZD2								FZD2
MSH6								MSH6
BMP4								BMP4
PIAS4								PIAS4
PRKCA								PRKCA
TPR								TPR
PIAS1								PIAS1
WNT5B								WNT5B
AXIN2								AXIN2
BCR								BCR
SOS1								SOS1
RARA								RARA
GLI2								GLI2
STK36								STK36
STAT1								STAT1
PIAS2								PIAS2
MIB1								MIB1
EPS15								EPS15
SPEN								SPEN
ADAM12								ADAM12
MFAP2								MFAP2
FBXW7								FBXW7
NOTCH2								NOTCH2
NOTCH1								NOTCH1
JAG1								JAG1
DLL1								DLL1
APH1A								APH1A
MYCBP								MYCBP
ADAM10								ADAM10
NCSTN								NCSTN
GATA3								GATA3
PSENEN								PSENEN
DNER								DNER
SMARCA2								SMARCA2
HBP1								HBP1
MYBL2								MYBL2
RYBP								RYBP
TFDP2								TFDP2
BRCA1								BRCA1
SIRT1								SIRT1
CDC6								CDC6
CDKN2C								CDKN2C
POLA1								POLA1
CES2								CES2
RBBP4								RBBP4
PRMT5								PRMT5
E2F7								E2F7
DHFR								DHFR
PTK2B								PTK2B
SDC1								SDC1
COL16A1								COL16A1
COL7A1								COL7A1
COL6A3								COL6A3
COL15A1								COL15A1
COL1A1								COL1A1
COL9A1								COL9A1
COL4A3								COL4A3
COL5A2								COL5A2
COL4A5								COL4A5
COL11A1								COL11A1
COL3A1								COL3A1
COL2A1								COL2A1
COL12A1								COL12A1
PXN								PXN
RPS6KB1								RPS6KB1
VAV3								VAV3
SPP1								SPP1
VTN								VTN
COL9A3								COL9A3
COL6A1								COL6A1
COL8A2								COL8A2
CGN								CGN
CCNT2								CCNT2
ZFYVE9								ZFYVE9
TRIM33								TRIM33
MTMR4								MTMR4
SKI								SKI
TGIF2								TGIF2
PPP1CC								PPP1CC
USP9X								USP9X
MEN1								MEN1
CDK9								CDK9
TGIF1								TGIF1
SMAD7								SMAD7
CCNT1								CCNT1
UCHL5								UCHL5
SMURF2								SMURF2
